# Supplementary material
Source: publisher figshare collection journal article supplement (https://acs.figshare.com/ndownloader/files/4122715)
Supplement: Supplementary file 1 [file 4122715]

Supporting Information for  
“Solvent selective hydrogen-deuterium exchange on saturated polyolefins”

Brian M. Habersberger, Timothy P. Lodge, Frank S. Bates

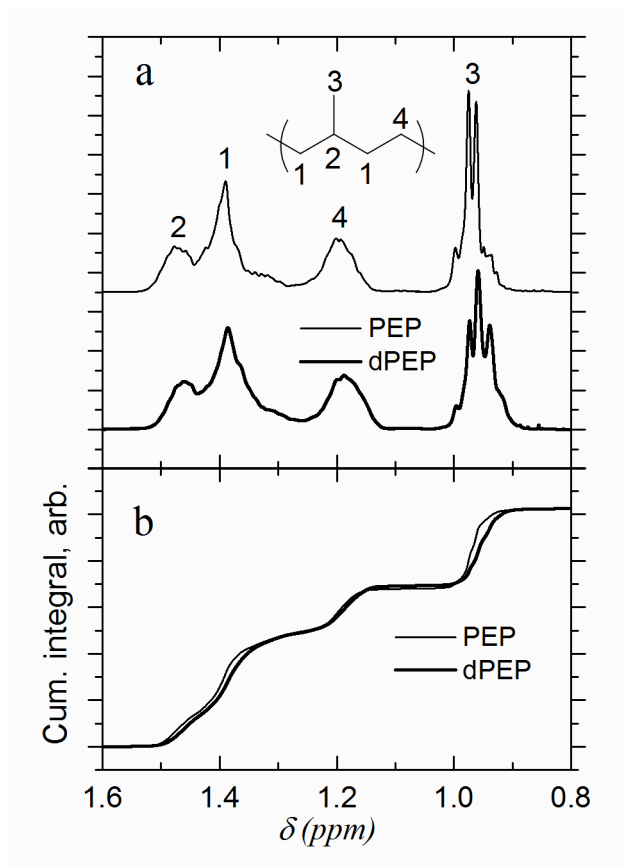

Figure S1.  $^1\text{H}$  NMR spectra (a) and cumulative integral of spectra (b) of PEP and dPEP

$^1\text{H}$  NMR spectra of unmodified PEP and PEP exchanged in heptane to an extent of  $y = 0.23$  (denoted dPEP) are presented in Figure S1.a. Figure S1.b, presented on the same abscissa scale for ease of comparison, plots the cumulative integral of the normalized NMR peaks. The plots overlap quite closely, indicating that deuterium is stoichiometrically distributed. The presence of

deuterium causes a shift which is most evident in the methyl peak in this case due to its sharpness.<sup>1</sup>

#### References

- 1) Batiz-Hernandez, H.; Bernheim, R. A. *Prog. Nucl. Magn. Reson. Spectrosc.* **1967**, 3, 63.
